# Supplementary material for: Cryptococcus neoformans and Cryptococcus gattii Species Complexes in Latin America: A Map of Molecular Types, Genotypic Diversity, and Antifungal Susceptibility as Reported by the Latin American Cryptococcal Study Group
Source: PubMed Central journal article supplement (PMC8069395; doi:10.3390/jof7040282), 2021-04-09
Supplement: jof-07-00282-s001.pdf [file jof-07-00282-s001.pdf]

**Supp. Table 1.** Data on the epidemiological cut-off values (ECVs) >95% per drug and molecular type as reported elsewhere [25, 26]. When a MIC is lower than or equal to the ECV, the isolates are likely from the wild type distribution of their molecular type for a particular antifungal drug, whereas if the MIC is greater than the ECV the isolates are from a non-wild type distribution and are likely to have an acquired form of resistance.

| <b>MT</b> | <b>Amphotericin-B</b> | <b>5-fluorocytosine</b> | <b>Fluconazole</b> | <b>Itraconazole</b> | <b>Voriconazole</b> | <b>Posaconazole</b> |
|-----------|-----------------------|-------------------------|--------------------|---------------------|---------------------|---------------------|
| VNI       | 0.5 µg/ml             | 8 µg/ml                 | 8 µg/ml            | 0.25 µg/ml          | 0.25 µg/ml          | 0.25 µg/ml          |
| VGI       | 0.5 µg/ml             | 4 µg/ml                 | 8 µg/ml            | 0.5 µg/ml           | 0.5 µg/ml           | 0.5 µg/ml           |
| VGII      | 1 µg/ml               | 16 µg/ml                | 32 µg/ml           | 0.5 µg/ml           | 0.25 µg/ml          | ND                  |
| VGIII     | ND                    | ND                      | 8 µg/ml            | 0.5 µg/ml           | ND                  | ND                  |

ND: Not determined
